# Supplementary material
Source: Springer Nature journal article supplement (https://www.springermedizin.de/resource/supplementary/12889_2011_4285_MOESM1_ESM.pdf/9491422)
Supplement: MOESM1 [file 9491422]

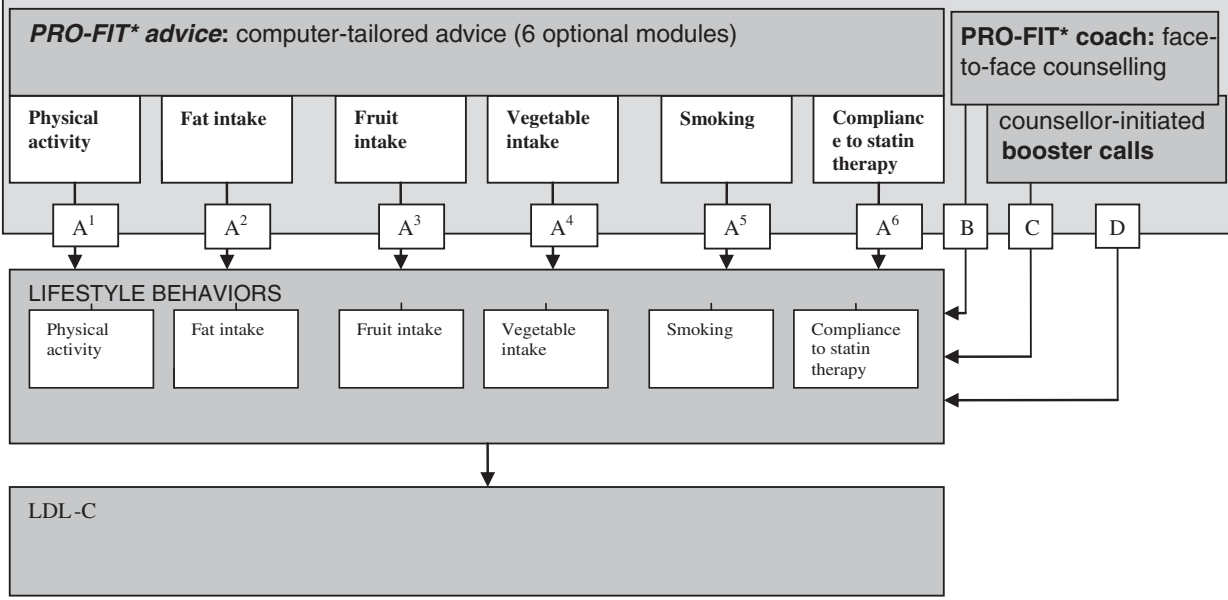

A<sup>1-6</sup> = Associations between the completion of *PRO-FIT\** advice modules and the related lifestyle behaviours

B = Association between counselling of the *PRO-FIT\** coach and the multiple lifestyle behaviours

C = Association between the telephone booster calls and lifestyle behaviours

D = A + B + C = Association between the complete intervention-package (at least one *PRO-FIT\** advice module, face-to-face counselling and at least one telephone booster call) and lifestyle behaviours

MI = Motivational Interviewing; LDL-C = Low Density Lipoprotein Cholesterol
